# Supplementary material
Source: Royal Society of Chemistry journal article supplement (doi:10.1039/d6ta02609e)
Supplement: d6ta02609e1.pdf [file d6ta02609e1.pdf]

## Supporting Information

### **Remote Plasma Polymers of Iron (II) Phthalocyanine in Polyacrylonitrile-Derived Carbon Electrospun Fibres as Electrode for Supercapacitors.**

Jose M. Obrero <sup>a\*</sup>, Jorge PV Tafoya <sup>b</sup>, Michael Thielke <sup>b</sup>, G.P. Moreno-Martínez <sup>a</sup>, Lidia Contreras-Bernal <sup>a,c</sup>, Jose Ferreira de Sousa Jr <sup>a</sup>, Juan Ramón Sánchez-Valencia <sup>a</sup>, Angel Barranco <sup>a</sup>, and Ana B. Jorge Sobrido <sup>b\*</sup>.

a) Nanotechnology on Surfaces and Plasma Laboratory, Materials Science Institute of Seville (CSIC-US), C/ Américo Vespucio 49, 41092, Seville, Spain.

b) Centre for Sustainable Engineering, School of Engineering and Materials Science, Faculty of Science and Engineering, Queen Mary University of London, Mile End Road, London, E1 4NS, UK

c) Química-Física. Department of Physical Chemistry, University of Seville, C/Professor García González n° 2, Seville 41012, Spain

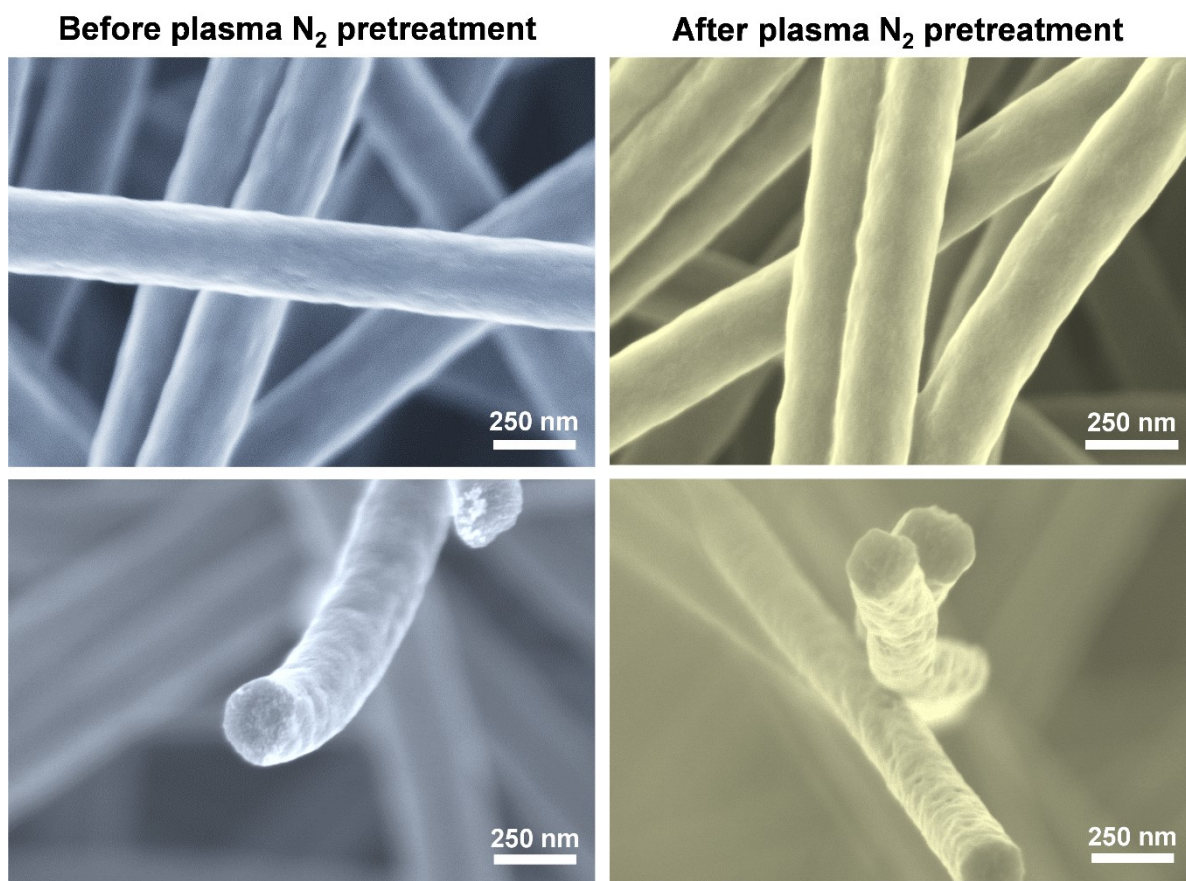

**Figure S1.** Comparative SEM micrographs of carbon nanofibres (CNFs) before and after N<sub>2</sub> plasma treatment. The untreated CNFs exhibit smooth and clean surfaces, characteristic of electrospun and carbonized PAN fibres. After exposure to N<sub>2</sub> plasma, the overall morphology and fibre diameter remain unchanged, confirming that the process is mild and does not cause structural damage. However, a slight increase in surface roughness can be observed, indicating the introduction of surface defects and nitrogen-containing functional groups that enhance the surface reactivity and adhesion for subsequent FePc deposition.

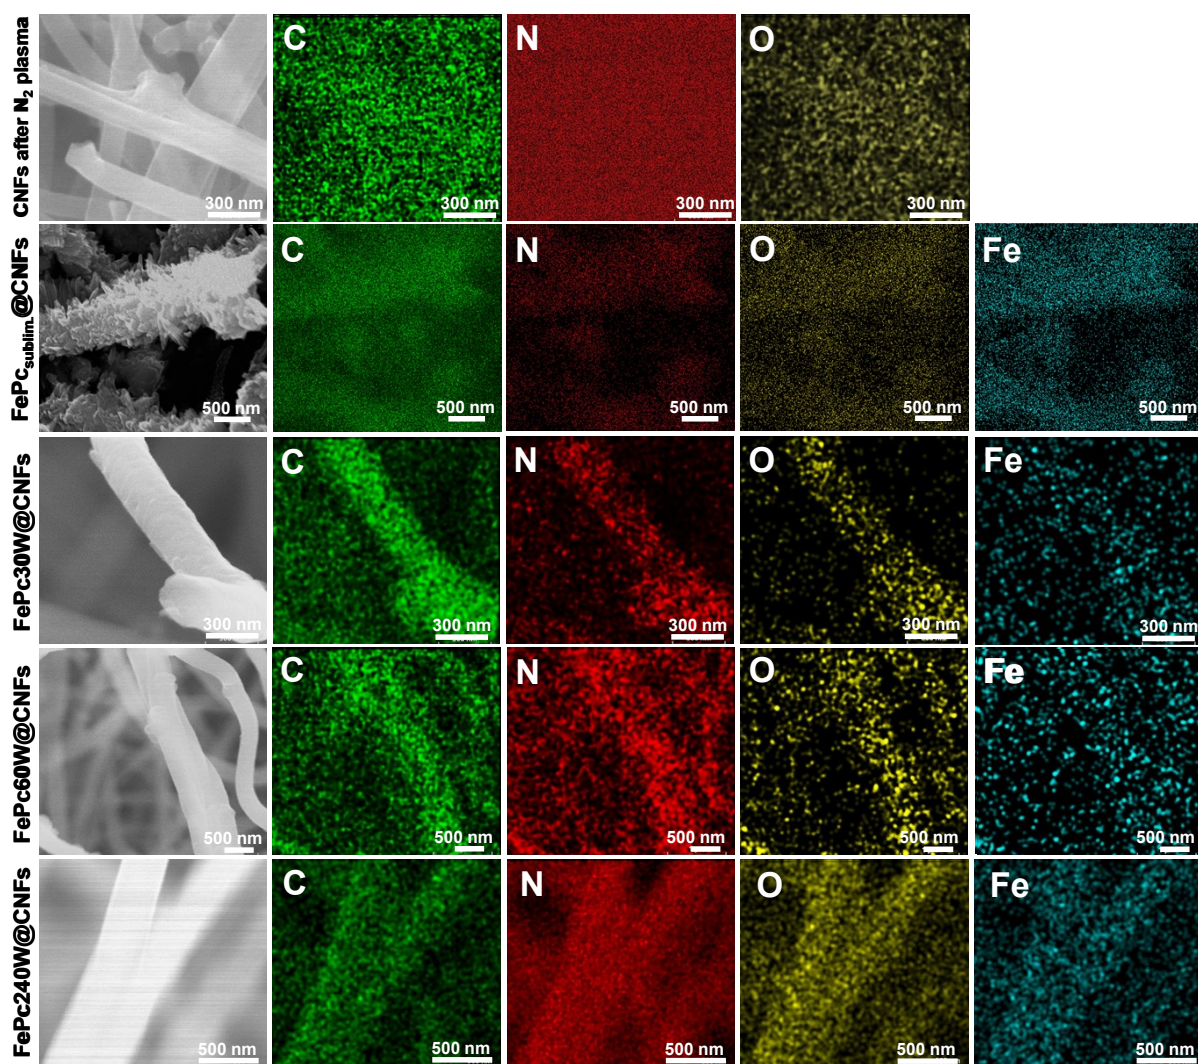

**Figure S2.** EDX elemental mapping of CNFs after N<sub>2</sub> plasma pretreatment, sublimated FePc and RPAVD-N<sub>2</sub> FePc coatings deposited at different plasma powers. Elemental distributions of C (green), N (red), O (yellow) and Fe (blue).

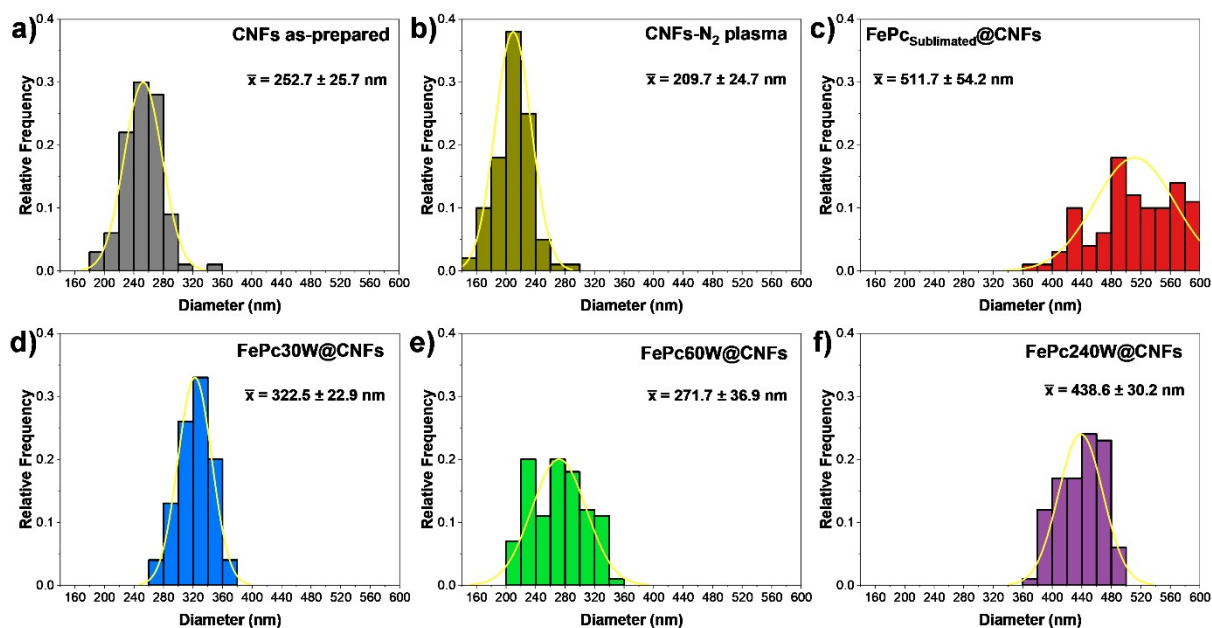

**Figure S3.** Diameter size distribution of CNFs samples determined from the analysis of SEM micrographs of a) CNFs as-prepared, b) CNFs after N<sub>2</sub> plasma treatment, c) FePc<sub>Sublimated</sub>@CNFs, d) FePc30W@CNFs, e) FePc60W@CNFs and f) FePc240W@CNFs.

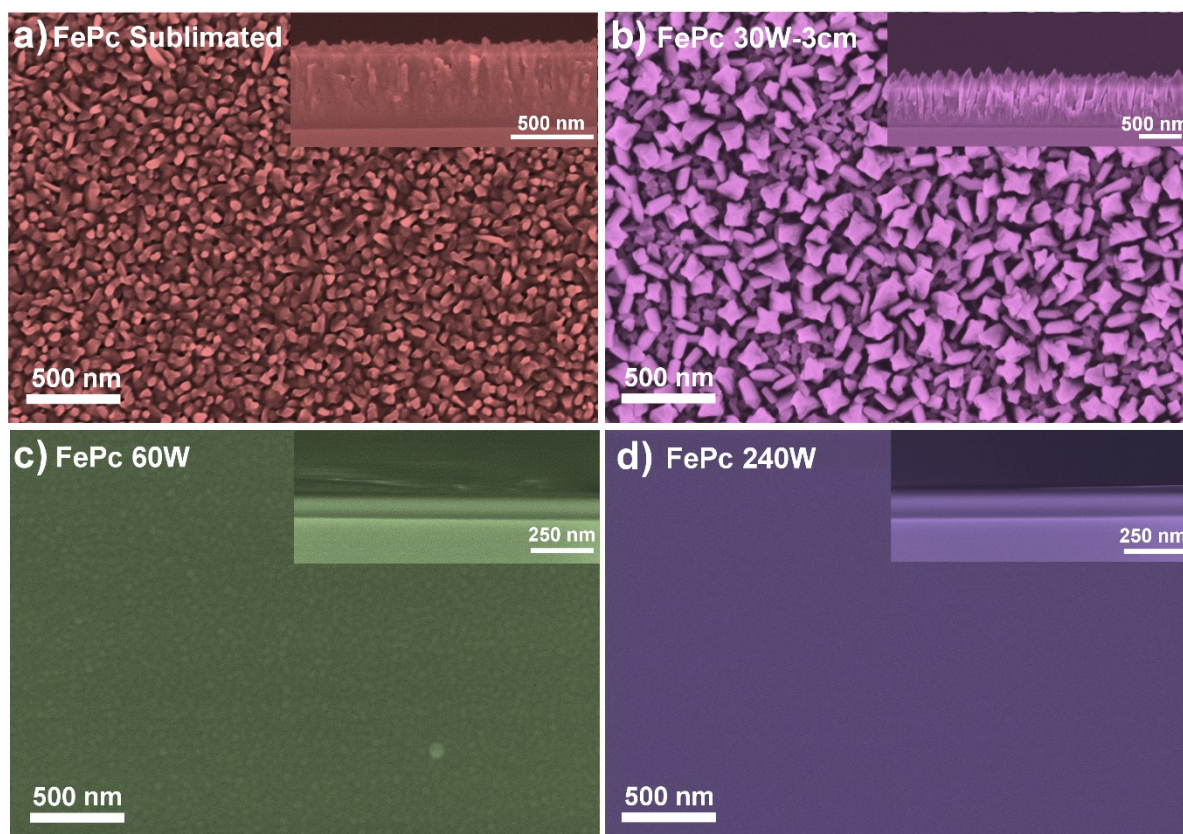

**Figure S4.** Top-view SEM micrographs and cross-sectional (inset) SEM images of FePc films on silicon: sublimated FePc and FePc plasma polymers deposited by RPAVD- $N_2$  at different polymerization degrees. (a) Sublimated FePc; (b) 30 W–3 cm; (c) 60 W; and (d) 240 W.

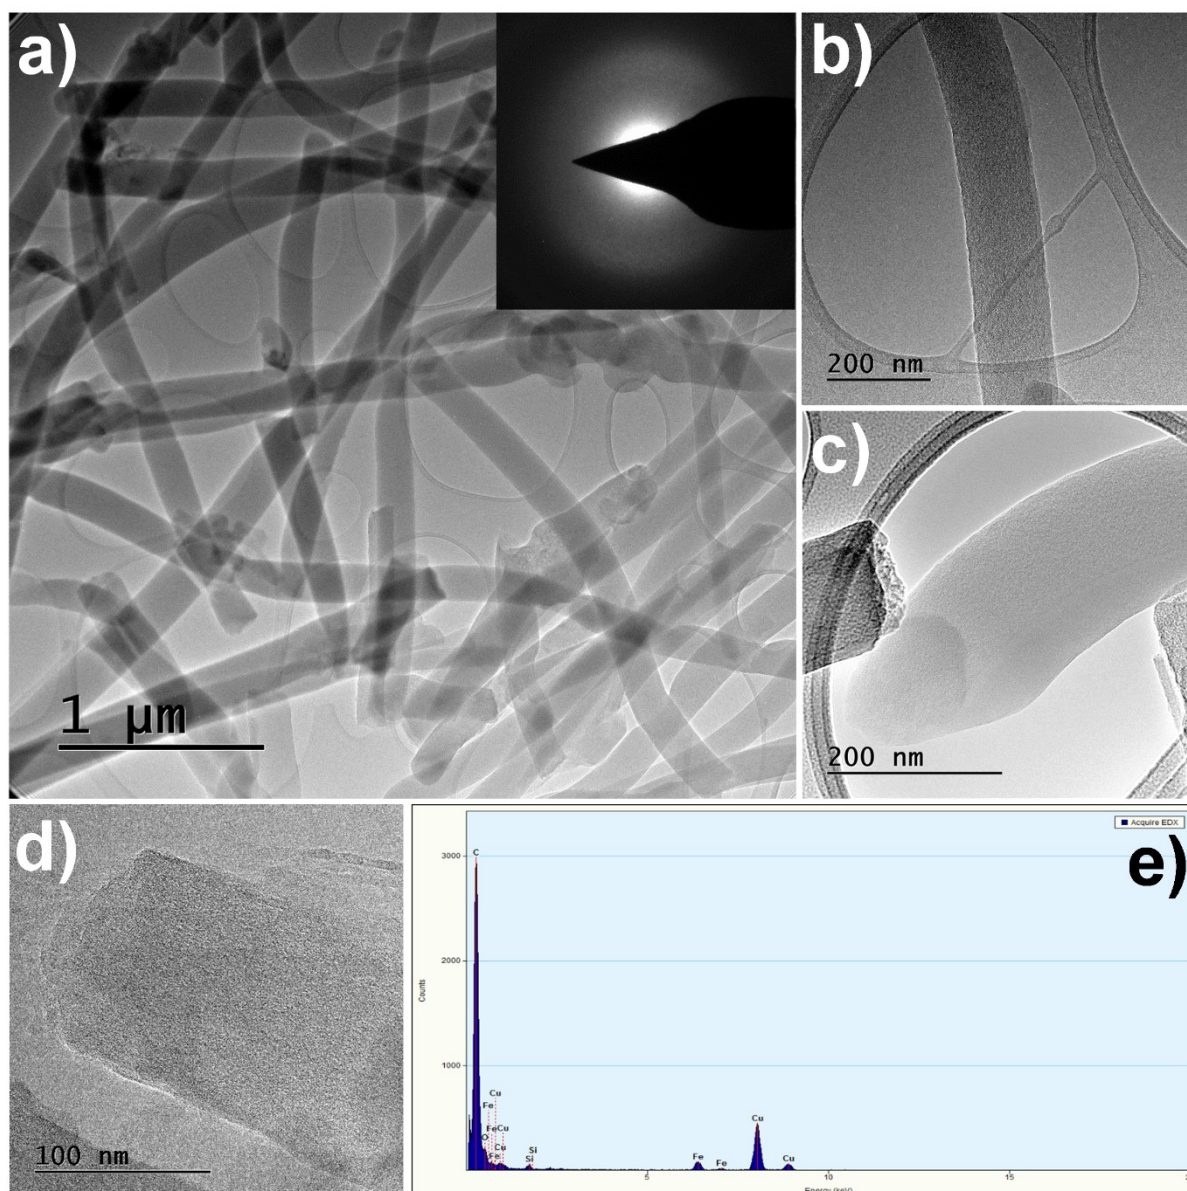

**Figure S5.** (a-d) TEM micrographs of a FePc60W@CNFs sample showing carbon nanofibres uniformly coated with the plasma-polymerised FePc layer. A continuous shell is clearly observed around each fibre. The inset in (a) shows the SAED pattern displaying a diffuse halo, confirming the amorphous nature of the plasma-polymerised coating. (e) STEM-EDX elemental mapping of the sample.

**Table S1.** Areal mass loading of the FePc plasma-polymer thin films determined by Rutherford Backscattering Spectrometry (RBS). The measurements correspond exclusively to the plasma-polymer coating deposited under each RPAVD-N<sub>2</sub> condition.

| Sample      | Mass loading (mg·cm <sup>-2</sup> ) |
|-------------|-------------------------------------|
| FePc30W 3cm | 0.063                               |
| FePc30W     | 0.024                               |
| FePc60W     | 0.017                               |
| FePc240W    | 0.021                               |

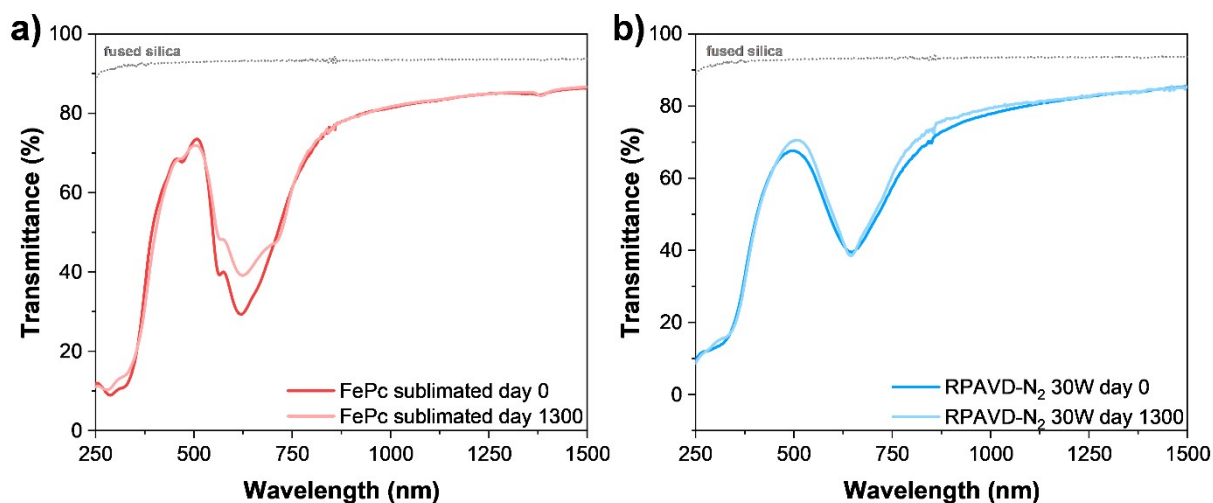

**Figure S6.** UV–Vis–NIR transmittance spectra of (a) sublimated FePc and (b) FePc30 W thin films, comparing as-deposited samples with those after air-exposure degradation for 1300 days.

The survey spectra and the atomic percentages of each element are shown in **Figures S7a and S7c**, respectively. Notable differences were observed in the relative amounts of carbon, nitrogen, and oxygen before and after N<sub>2</sub> plasma exposure. Specifically, the as-prepared CNFs contain C = 85.7%, N = 9.2%, O = 4.8%, and Na = 0.3%; whereas the plasma-treated CNFs exhibit C = 69.5%, N = 18.0%, O = 10.4%, and Na = 2.0%. These results confirm the incorporation of nitrogen-containing functional groups from the plasma into the fibrous matrix. The presence of sodium is most likely due to contamination introduced during handling, stabilisation or carbonisation.

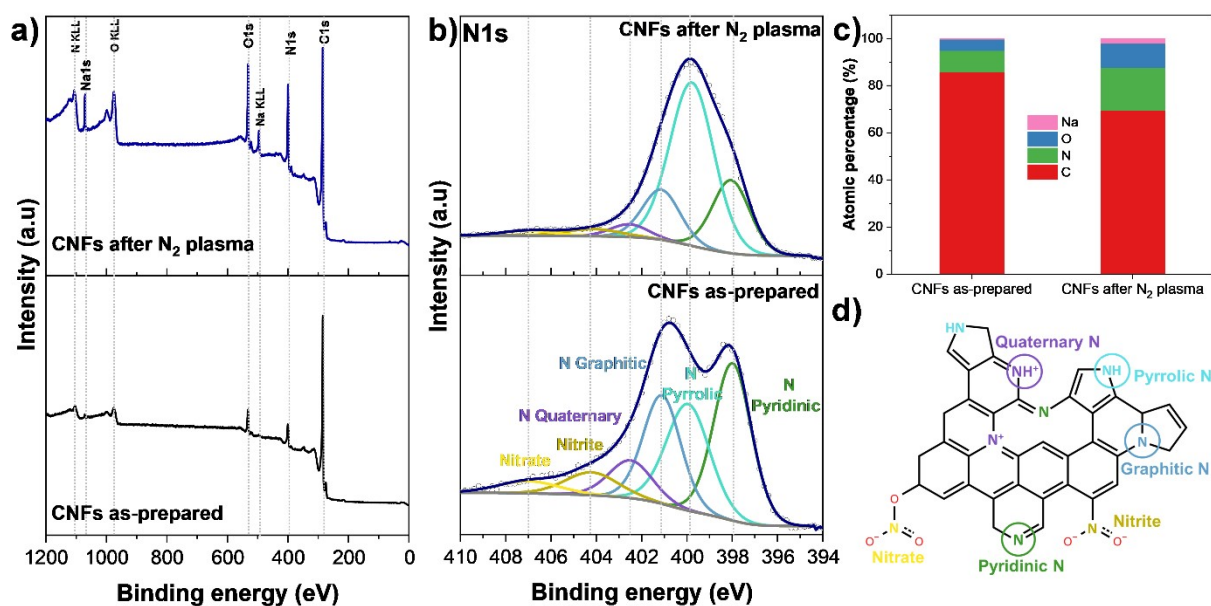

**Figure S7.** (a) XPS survey spectra of CNFs before and after  $N_2$  plasma pretreatment. (b) High-resolution  $N1s$  spectra highlighting the evolution of nitrogen species upon plasma exposure. (c) Atomic percentages of C, N, O, and Na quantified from the XPS data. Both samples display the characteristic features of nitrogen-doped carbon materials, including pyridinic N (398.0 eV), pyrrolic N (399.9 eV), graphitic N (401.1 eV), and positively charged quaternary N (402.5 eV), as well as oxidized nitrogen species, namely  $-NO_2$  (404.2 eV) and  $-NO_3$  (407.0 eV).<sup>1</sup> After  $N_2$  plasma treatment, the pyrrolic-N component increases markedly at the expense of the other species, indicating that the plasma induces a soft etching process that partially fragments the carbon rings. The highly reactive  $N_2$  species then react with the resulting carbon radicals, promoting the incorporation of additional nitrogen and the formation of new pyrrolic-type sites. This nitrogen enrichment, particularly in pyrrolic-type sites, is expected to influence the coordination behaviour of FePc upon deposition. (d) Schematic representation of nitrogen functionalities and defect sites introduced into the CNF surface.

(1) Hellgren, N.; Haasch, R. T.; Schmidt, S.; Hultman, L.; Petrov, I. Interpretation of X-Ray Photoelectron Spectra of Carbon-Nitride Thin Films: New Insights from in Situ XPS. *Carbon* **2016**, *108*, 242–252. <https://doi.org/10.1016/j.carbon.2016.07.017>.

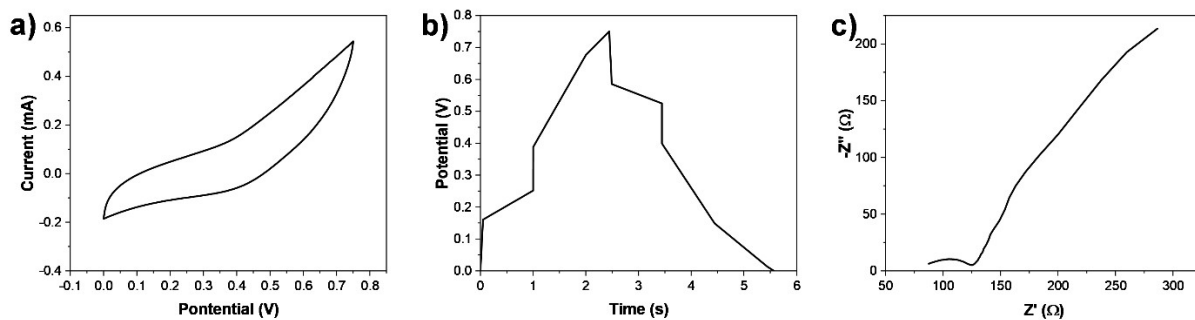

**Figure S8.** Electrochemical performance of N<sub>2</sub> plasma pre-treated CNTs. (a) Cyclic voltammetry curve recorded at a scan rate of 10 mV·s<sup>-1</sup>. (b) Galvanostatic charge-discharge profile measured at a current density of 0.25 A·g<sup>-1</sup>. (c) Electrochemical impedance spectroscopy (EIS) response.

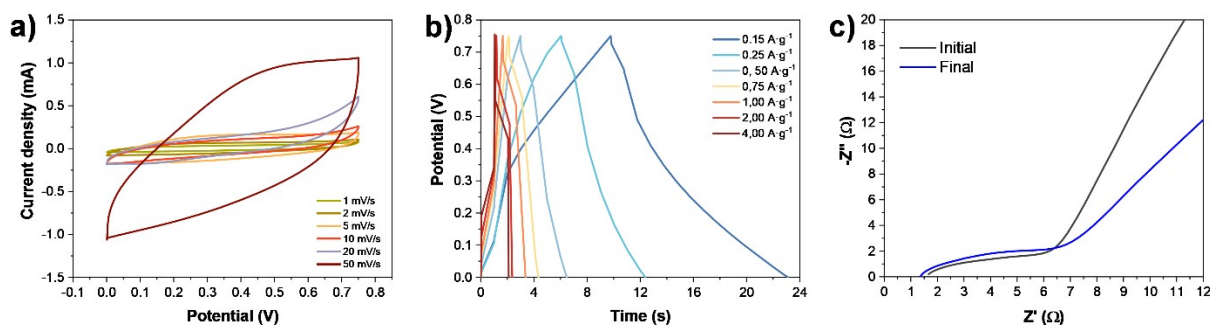

**Figure S9.** Electrochemical performance of FePc<sub>sublimated</sub>@CNFs electrode. (a) Cyclic voltammetry curve recorded at a scan rate of 10 mV·s<sup>-1</sup>. (b) Galvanostatic charge-discharge profile measured at a current density of 0.25 A·g<sup>-1</sup>. (c) Electrochemical impedance spectroscopy (EIS) response.

**Table S2.** Coefficients of the pseudocapacitive model  $i(v)=k_1 \cdot v+k_2 \cdot v^{1/2}$  at selected voltages.

| Potential        | $k_1$<br>(mA·mV <sup>-1</sup> ·s <sup>-2</sup> ) | Error $k_1$ | $k_2$<br>(mA·mV <sup>-1</sup> ·s <sup>-1/2</sup> ) | Error $k_2$ | R <sup>2</sup> |
|------------------|--------------------------------------------------|-------------|----------------------------------------------------|-------------|----------------|
| 0.00 V           | -0.069850                                        | ±0.010320   | -0.161090                                          | ±0.060580   | 0.99072        |
| 0.40 V (forward) | 0.079900                                         | ±0.008600   | 0.152616                                           | ±0.050600   | 0.99480        |
| 0.75 V           | 0.077922                                         | ±0.006861   | 0.213459                                           | ±0.040260   | 0.99697        |
| 0.40 V (reverse) | -0.075000                                        | ±0.009700   | -0.139800                                          | ±0.056700   | 0.99250        |

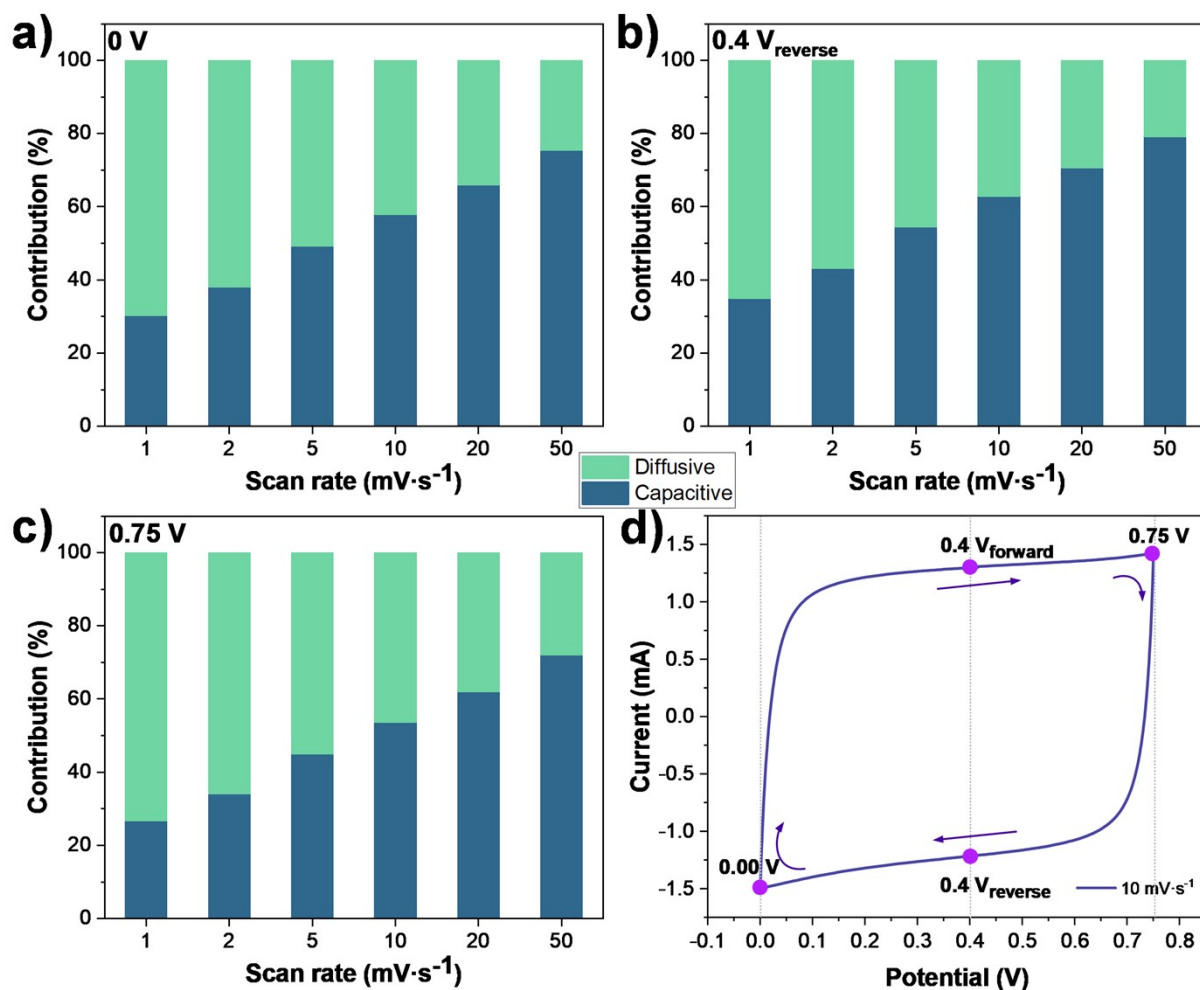

**Figure S10.** Deconvolution of capacitive and diffusive contributions at selected potentials for FePc30W@CNFs electrodes. Bar graphs showing the relative contributions of capacitive (blue) and diffusive (green) currents at scan rates from 1 to 50 mV·s<sup>-1</sup>, extracted at: (a) 0.00 V, (b) 0.40 V (reverse scan) and (c) 0.75 V. Cyclic voltammogram highlighting the selected potentials (magenta dots) used for the deconvolution analysis.

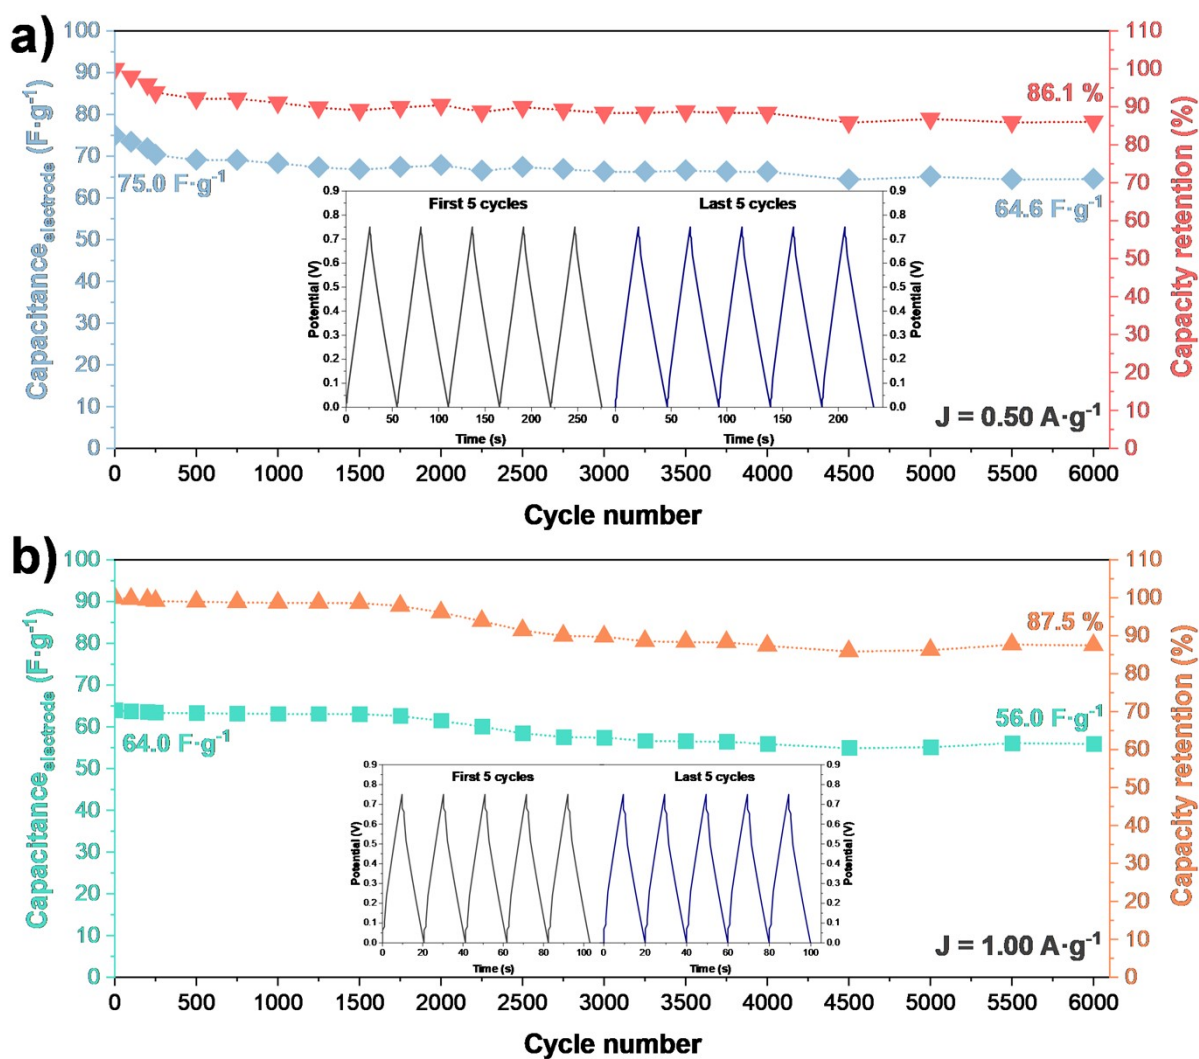

**Figure S11.** Cycling stability and capacitance retention of FePc30W@CNFs at (a)  $0.50 \text{ A}\cdot\text{g}^{-1}$  and (b)  $1.00 \text{ A}\cdot\text{g}^{-1}$ . Each inset shows the first and last five cycles during the stability test.

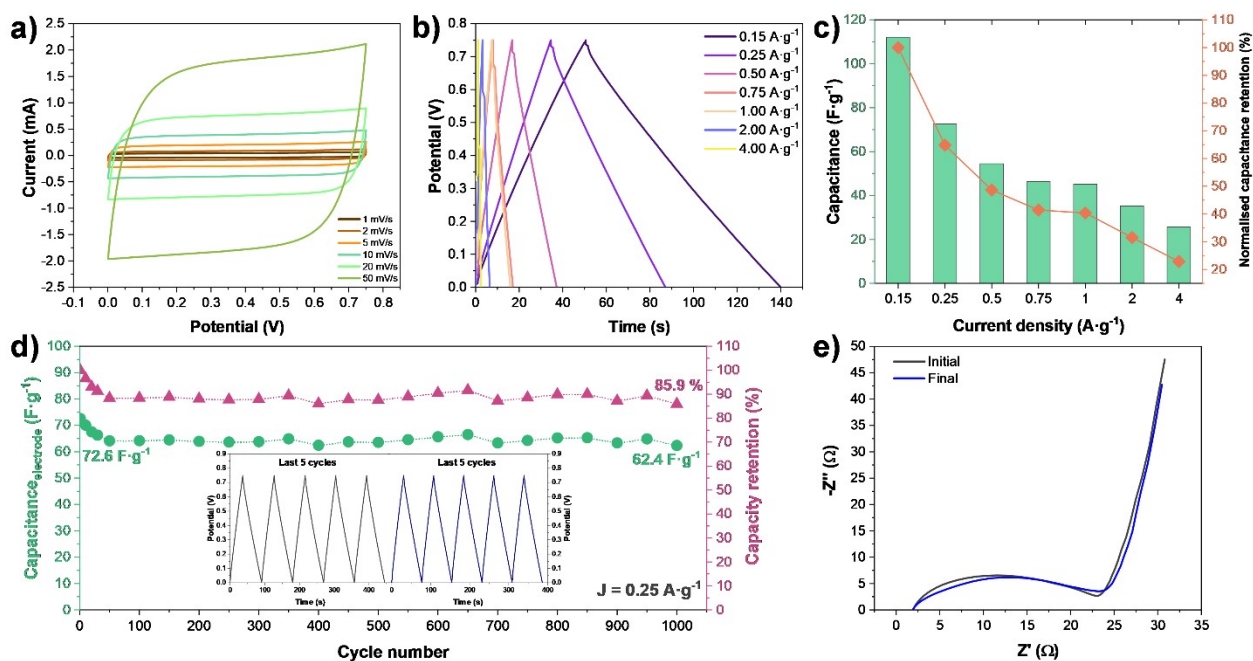

**Figure S12. Electrochemical performance of FePc60W@CNFs sample.** (a) CV curves recorded at scan rates ranging from 1 to 50 mV·s<sup>-1</sup>. (b) GCD curves recorded at various current densities. (c) Specific capacitance ( $C_{\text{electrode}}$ ) as a function of current density, along with the normalised capacitance relative to the lowest current density (0.15 A·g<sup>-1</sup>). (d) Cycling stability and capacitance retention at 0.25 A·g<sup>-1</sup>. The inset shows the first and last five cycles during the stability test. (e) Nyquist plots recorded before and after cycling.

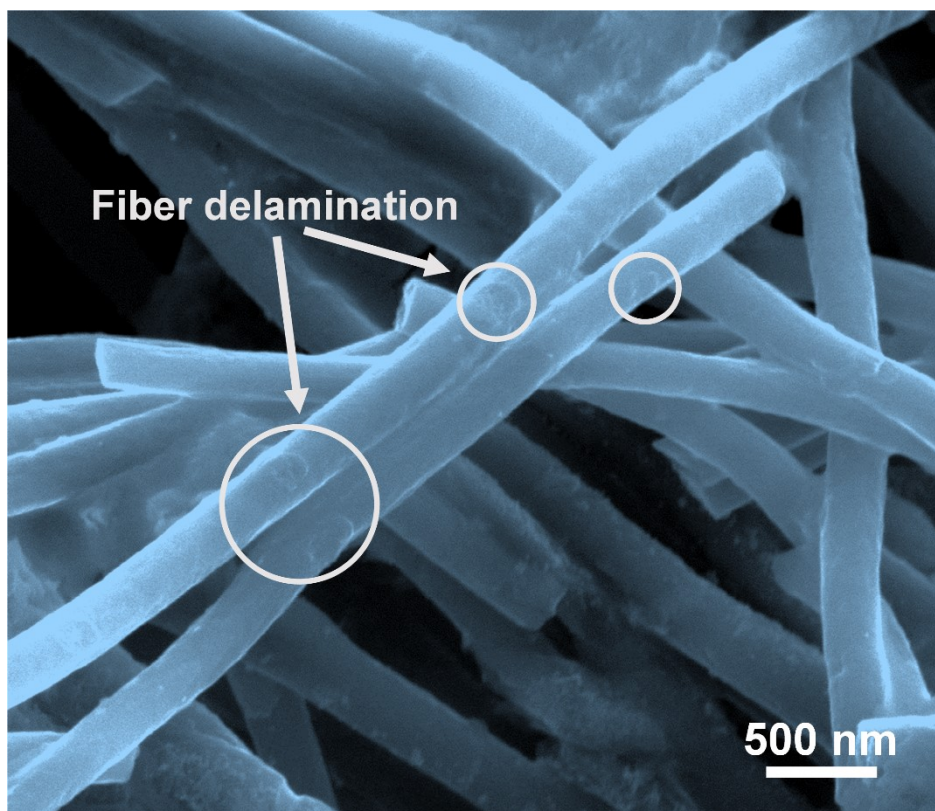

**Figure S13.** SEM micrographs of post-treated FePc30W@CNFs sample after 6000 charge-discharge cycles. Regions of partial delamination of the plasma-polymer coating have been labelled, attributed to electrode-electrolyte separation during cycling, which leads to the exposure of bare fibre areas.

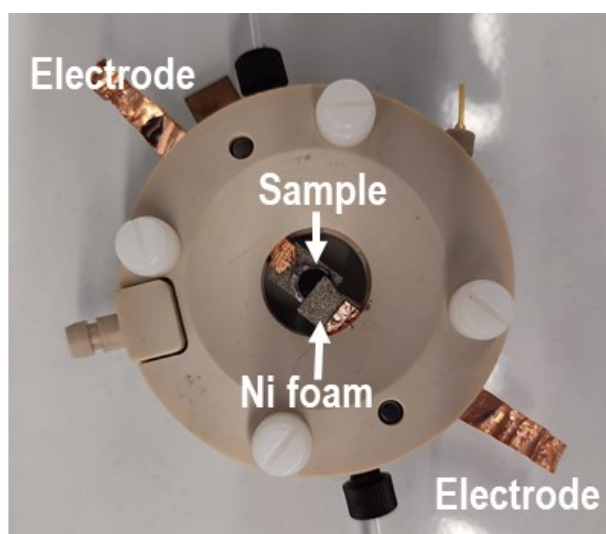

**Figure S14.** Top-view of the experimental set-up of *in situ* Raman measurements.



**Table S3.** Comparison of the result of this study with previous similar works on supercapacitor based in metal-phthalocyanines.

| Electrode type                                 | Method                                                        | Specific Capacitance                                                                                        | Energy Density                                                           | Power Density                                                          | Cycling stability                                                     |                           | Electrolyte                                               | Ref.             |
|------------------------------------------------|---------------------------------------------------------------|-------------------------------------------------------------------------------------------------------------|--------------------------------------------------------------------------|------------------------------------------------------------------------|-----------------------------------------------------------------------|---------------------------|-----------------------------------------------------------|------------------|
|                                                |                                                               |                                                                                                             |                                                                          |                                                                        | No. of cycles                                                         | Capacitance retention (%) |                                                           |                  |
| FePc@C-HTC                                     | Hydrothermal carbonisation + pyrolysis                        | 48 F·g <sup>-1</sup> at 0.2 A·g <sup>-1</sup>                                                               | 1.7 Wh·kg <sup>-1</sup>                                                  | 140.3 W·kg <sup>-1</sup>                                               | 10000 at 5 A·g <sup>-1</sup>                                          | 99                        | 2M H <sub>2</sub> SO <sub>4</sub>                         | 15               |
| FePc@GO                                        | Self-assembly via $\pi$ - $\pi$ interactions                  | 235.5 F·g <sup>-1</sup> at 1 A·g <sup>-1</sup>                                                              | 8.2 Wh·kg <sup>-1</sup>                                                  | 531.9 W·kg <sup>-1</sup>                                               | 60000 at 5 A·g <sup>-1</sup>                                          | 100                       | 6M KOH                                                    | 16               |
| FePc@NC-1000                                   | MOF synthesis + CVD carbonisation + FePc assembly             | 0.03 F·cm <sup>-2</sup> at 5.96 A·cm <sup>-2</sup>                                                          | n/a                                                                      | 0.12 W·cm <sup>-2</sup>                                                | 10 h duration                                                         | 98.4                      | Alcaline solution                                         | 66               |
| FePc@MWNCTs                                    | one step in-situ precipitation                                | 65.3 F·g <sup>-1</sup> at 0.25 A·g <sup>-1</sup>                                                            | 29.7 Wh·kg <sup>-1</sup>                                                 | 125.0 W·kg <sup>-1</sup>                                               | 30000 at 8 A·g <sup>-1</sup>                                          | 111.3                     | 1M H <sub>2</sub> SO <sub>4</sub>                         | 65               |
| CoPc@CNTs                                      | acid-treated CNTs + CoPc ultrasonication                      | 1112 F·g <sup>-1</sup> at 1 A·g <sup>-1</sup>                                                               | 55.6 Wh·kg <sup>-1</sup>                                                 | 122.0 W·kg <sup>-1</sup>                                               | 1000 at 1 A·g <sup>-1</sup>                                           | 95                        | 6M KOH                                                    | 14               |
| nCuPc+TiN                                      | Hydrothermal                                                  | 29.7 F·g <sup>-1</sup> at 0.25 A·g <sup>-1</sup>                                                            | 2.4 Wh·kg <sup>-1</sup>                                                  | 388 W·kg <sup>-1</sup>                                                 | 30000 at 0.5 A·g <sup>-1</sup>                                        | 93.5                      | 1M Na <sub>2</sub> SO <sub>4</sub>                        | 67               |
| $\beta$ -ZnPc molecular crystal                | Ring-closure reaction+annealing at 400 °C                     | 49.1 F·g <sup>-1</sup> at 0.10 A·g <sup>-1</sup>                                                            | 86.2 Wh·kg <sup>-1</sup>                                                 | 220 W·kg <sup>-1</sup>                                                 | 100000 at 2 A·g <sup>-1</sup>                                         | 73.4                      | PVA/Zn(CF <sub>3</sub> SO <sub>3</sub> ) <sub>2</sub> gel | 68               |
| NiPc@MWCNT                                     | MWCNTs + NiPc ultrasonication                                 | 0.19 F·cm <sup>-2</sup> at 1 mA·cm <sup>-2</sup>                                                            | 0.05 Wh·cm <sup>-2</sup>                                                 | 0.7 W·cm <sup>-2</sup>                                                 | 5000 at 10 mA·cm <sup>-2</sup>                                        | 60                        | PBS/KFC                                                   | 11               |
| CoPc@MWCNT                                     | MWCNTs + CoPc ultrasonication                                 | 0.51 F·cm <sup>-2</sup> at 1 mA·cm <sup>-2</sup>                                                            | 0.14 Wh·cm <sup>-2</sup>                                                 | 0.7 W·cm <sup>-2</sup>                                                 | 5000 at 10 mA·cm <sup>-2</sup>                                        | 92                        | PBS/KFC                                                   | 11               |
| NiPc NF-rGO                                    | NiPc nanofibre synthesis + rGO hydrothermal assembly          | 223.3 F·g <sup>-1</sup> at 1 A·g <sup>-1</sup>                                                              | 15.2 Wh·kg <sup>-1</sup>                                                 | 349.9 W·kg <sup>-1</sup>                                               | 1000 at 1 A·g <sup>-1</sup>                                           | n/a                       | 1M H <sub>2</sub> SO <sub>4</sub>                         | 69               |
| NiPc@C-HTC                                     | Hydrothermal carbonisation + pyrolysis                        | 48 F·g <sup>-1</sup> at 0.2 A·g <sup>-1</sup>                                                               | ≈1.6 Wh·kg <sup>-1</sup>                                                 | ≈120 W·kg <sup>-1</sup>                                                | 10000 at 5 A·g <sup>-1</sup>                                          | 98                        | 2M H <sub>2</sub> SO <sub>4</sub>                         | 15               |
| <b>Plasma polymer of FePc@electrospun CNFs</b> | <b>Remote plasma N<sub>2</sub> assisted vapour deposition</b> | <b>80.9 F·g<sup>-1</sup> at 0.25 A·g<sup>-1</sup> and 0.79 F·cm<sup>-2</sup> at 4.87 mA·cm<sup>-2</sup></b> | <b>6.3 Wh·kg<sup>-1</sup> and 6.2·10<sup>-5</sup> Wh·cm<sup>-2</sup></b> | <b>375 W·kg<sup>-1</sup> and 3.6·10<sup>-4</sup> W·cm<sup>-2</sup></b> | <b>6000 at 1 A·g<sup>-1</sup> and 6000 at 19.4 mA·cm<sup>-2</sup></b> | <b>87.5</b>               | <b>6M KOH</b>                                             | <b>This work</b> |
